# Supplementary material for: Few-layered CuInP2S6nanosheet with sulfur vacancy boosting photocatalytic hydrogen evolution
Source: Royal Society of Chemistry journal article supplement (doi:10.1039/d0ce01487g), 2020-11-23
Supplement: d0ce01487g1.pdf [file d0ce01487g1.pdf]

## Electronic Supplementary Information

### Few-Layered CuInP<sub>2</sub>S<sub>6</sub> Nanosheet with Sulfur Vacancy Boosting Photocatalytic Hydrogen Evolution

Peng Yu,<sup>a,b</sup> Fengmei Wang,<sup>\*b</sup> Jun Meng,<sup>c</sup> Tofik Ahmed Shifa,<sup>b</sup> Marshet Getaye

Sendeku,<sup>b</sup> Ju Fang,<sup>d</sup> Shuxian Li,<sup>d</sup> Zhongzhou Cheng,<sup>b</sup> Xiaoding Lou<sup>\*a</sup> and Jun He<sup>b</sup>

<sup>a</sup> Engineering Research Center of Nano-Geomaterials of Ministry of Education, Faculty of Materials Science and Chemistry, China University of Geosciences, Wuhan 430074, China. E-mail: [louxiaoding@cug.edu.cn](mailto:louxiaoding@cug.edu.cn)

<sup>b</sup> CAS Center for Excellence in Nanoscience, CAS Key Laboratory of Nanosystem and Hierarchical Fabrication, National Center for Nanoscience and Technology, Beijing 100190, China. E-mail: [wangfm@nanoctr.cn](mailto:wangfm@nanoctr.cn)

<sup>c</sup> Division of Interfacial Water and Key Laboratory of Interfacial Physics and Technology, Shanghai Institute of Applied Physics, Chinese Academy of Sciences, Shanghai 201800, China

<sup>d</sup> School of Physics and Technology, Key Laboratory of Artificial Micro- and Nano-structures of Ministry of Education, Wuhan University, Wuhan, 430072, China

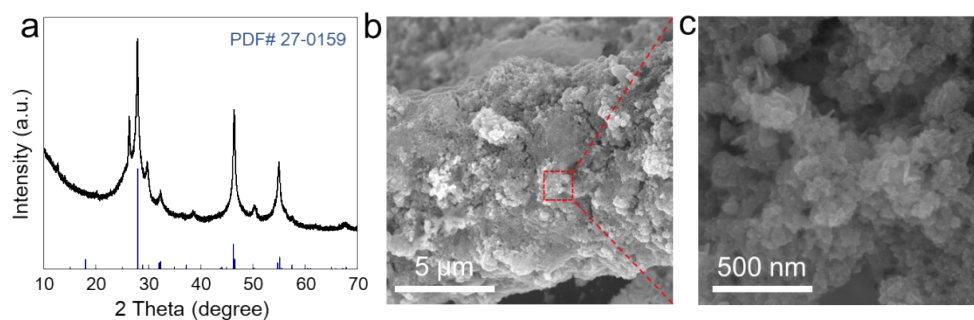

**Fig. S1** (a) XRD pattern of  $\text{CuInS}_x/\text{CFs}$  precursor. (b, c) SEM images of  $\text{CuInS}_x$  nanocrystal on the carbon fibers and corresponding partial enlarged image.

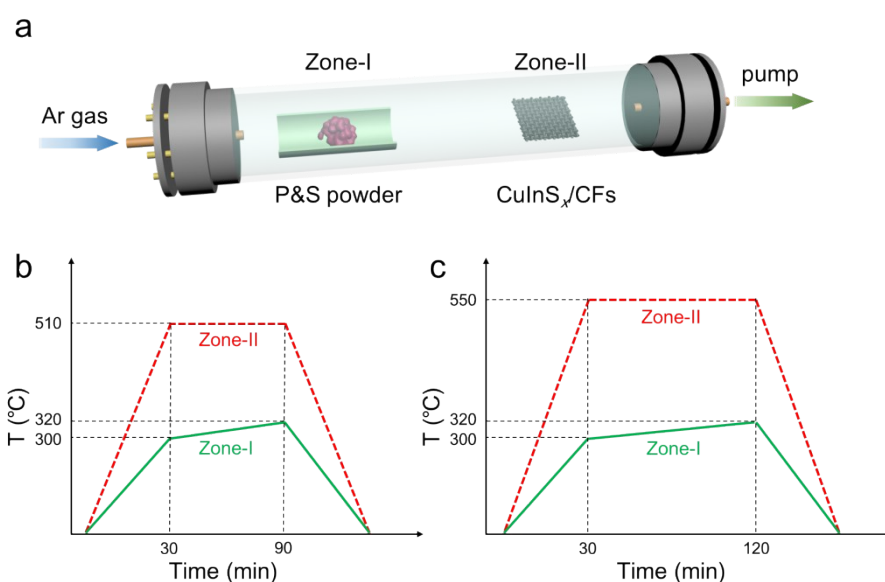

**Fig. S2** (a) Schematic diagram of chemical vapor conversion synthesis of CIPS crystals on the carbon fibers. (b, c) The heating procedure profile for growing CIPS NSs (b) and CIPS MSs (c). In details, first, the P&S powder (Zone- I ) is heated to 300 °C within 30 min, while the  $\text{CuInS}_x/\text{CFs}$  (Zone- II ) is heated to 510 and 550 °C for synthesizing CIPS NSs and MSs, respectively. And then, the zone- I is heated to 320 °C finally within 60 min for CIPS NSs and 90 min for CIPS MSs synthesis at 510 and 550 °C, respectively. Finally, after the heating procedure is completed, it is naturally cooled to room temperature.

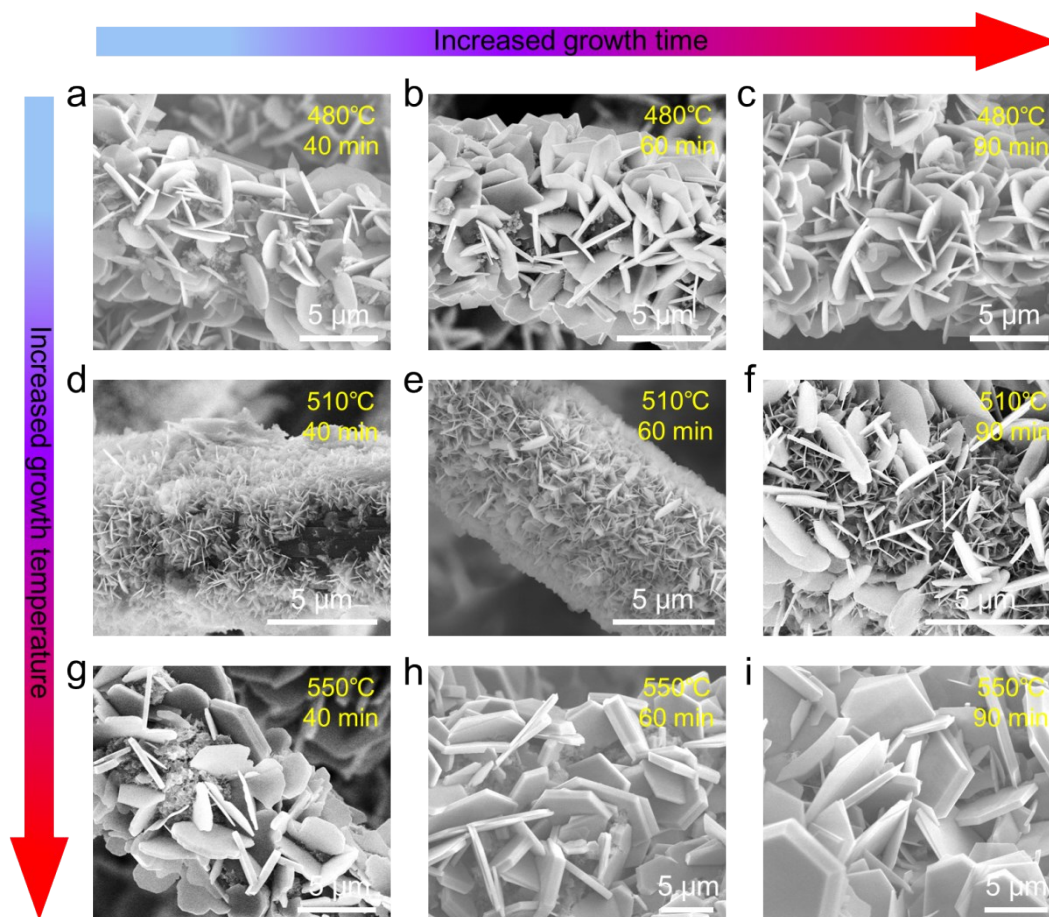

**Fig. S3** SEM images of different synthesized CIPS sheets under various growth parameters. The CIPS sheets synthesized at 480 °C (a-c), 510 °C (d-f) and 550 °C (g-i) within different reaction times of 40 min, 60 min and 90 min, respectively. If the growth time is shorter than 40 min, we found that a mixture of residual precursors and unevenly distributed CIPS sheets on the carbon fibers at 480 °C. But, if the synthesis was conducted at high reaction temperature (550 °C) within longest time (90 min), some thick CIPS sheets would be obtained. Thus, the carefully control of the reaction time and temperature is critical for synthesizing CIPS nanosheets. Applying suitable reaction time, like 60 min, and temperature (510 °C), the uniform CIPS nanosheets can be synthesized and covered the carbon fibers.

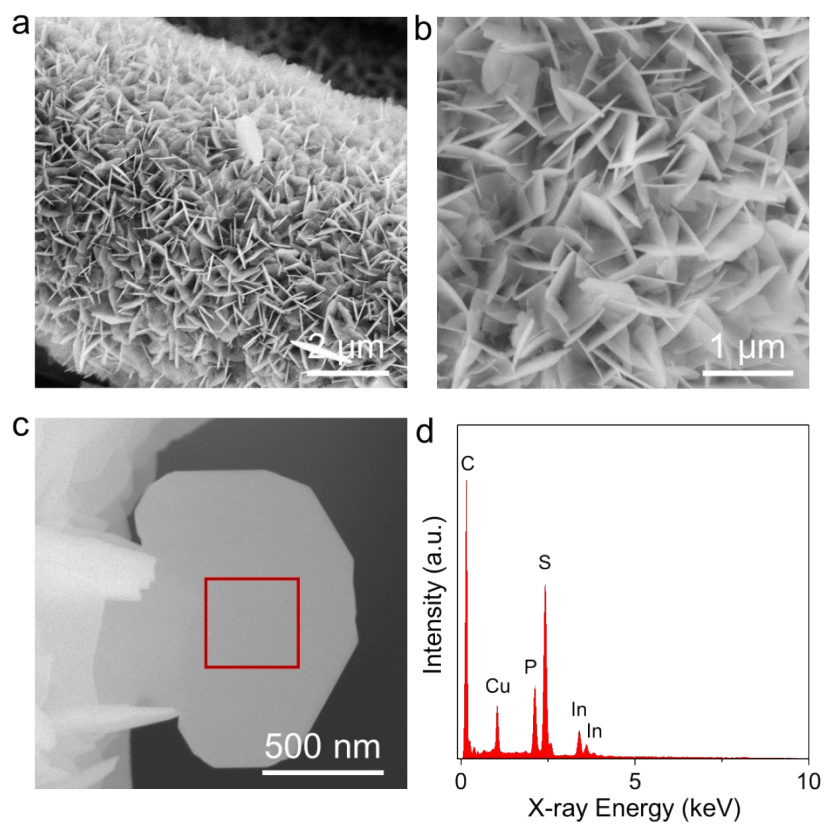

**Fig. S4** (a-c) SEM images of CIPS NSs synthesized at 510 °C within 60 min. (d) Corresponding EDX spectrum collected from marked region in c.

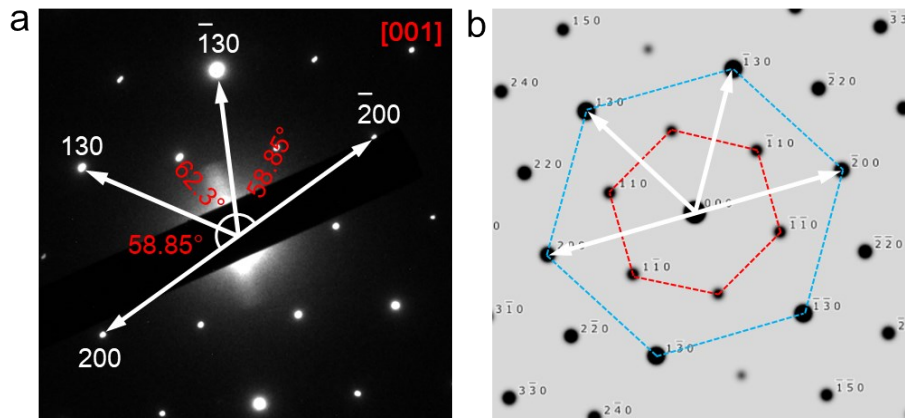

**Fig. S5** (a) SAED pattern of CIPS NSs (b) Simulated pattern based on the standard Cif file of monoclinic CIPS crystal by using the CrystalDiffract software.

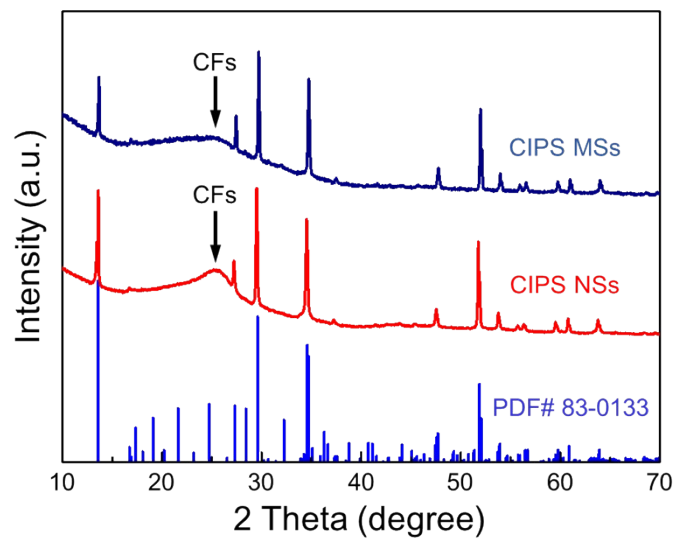

**Fig. S6** XRD patterns of the CIPS MSs and NSs on the carbon fibers.

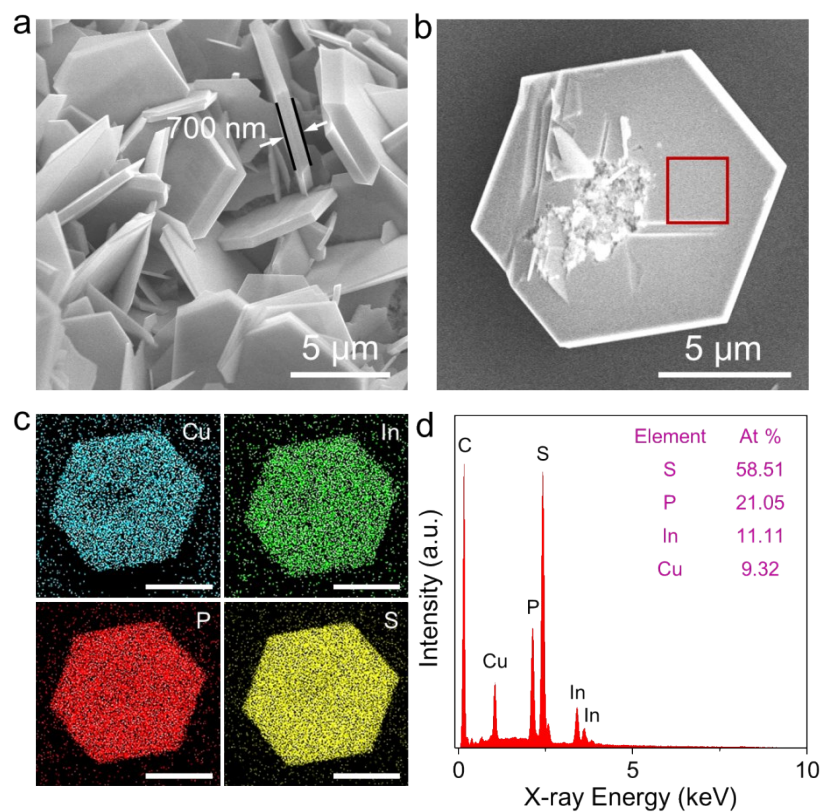

**Fig. S7** (a, b) SEM images of the as-prepared CIPS MSs on the carbon fibers (a) and single CIPS microsheet (b). (c) EDX elemental mapping of CIPS MSs and (d) EDX spectrum of CIPS MSs with the atomic ratio of Cu: In: P: S nearly to 1: 1: 2: 6 collected from marked region in b.

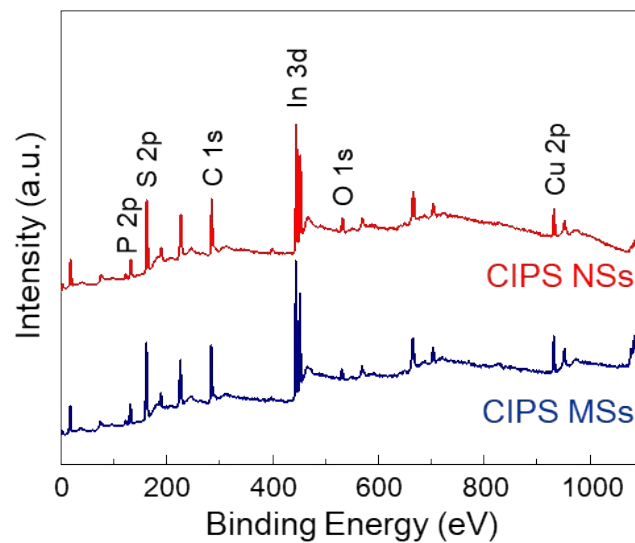

**Fig. S8** Comparison of XPS spectra of the CIPS MSs and NSs.

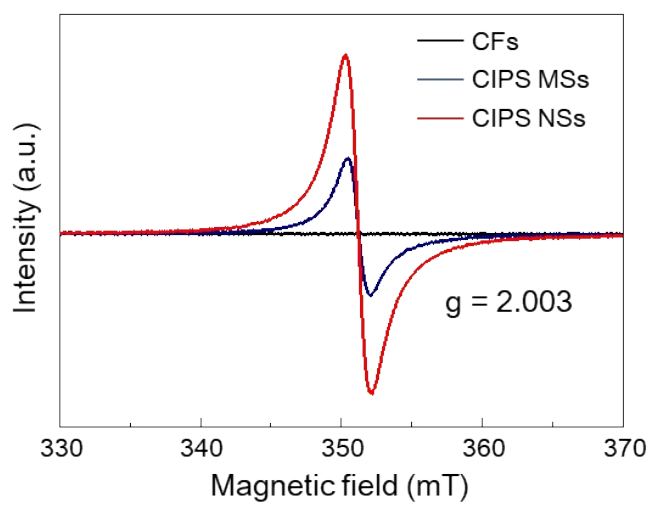

**Fig. S9** Room-temperature ESR spectra of the CIPS MSs and NSs, in which the signal at  $g = 2.003$  corresponds to the sulfur vacancies.

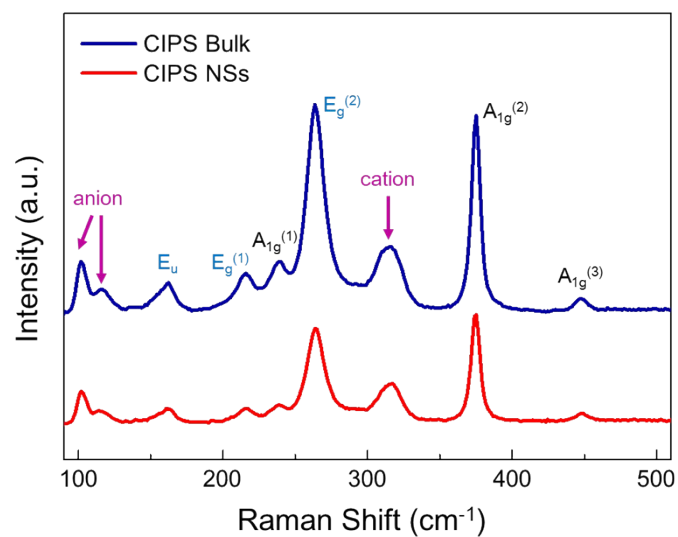

**Fig. S10** Raman spectra of the CIPS MSs and NSs at room temperature, where the cation and anion are  $\text{Cu}^+$ ,  $\text{In}^{3+}$  and  $[\text{P}_2\text{S}_6]^{4-}$ , respectively.

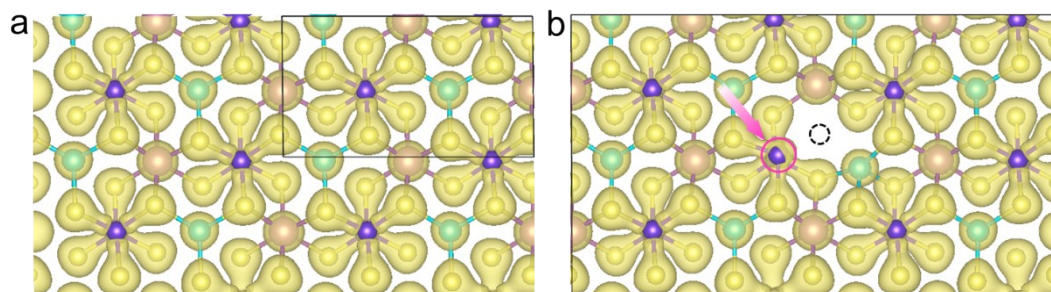

**Fig. S11** Charge density distributions of CIPS monolayer (a) and S defective CIPS monolayer (b). Isosurface level equals to 0.1.



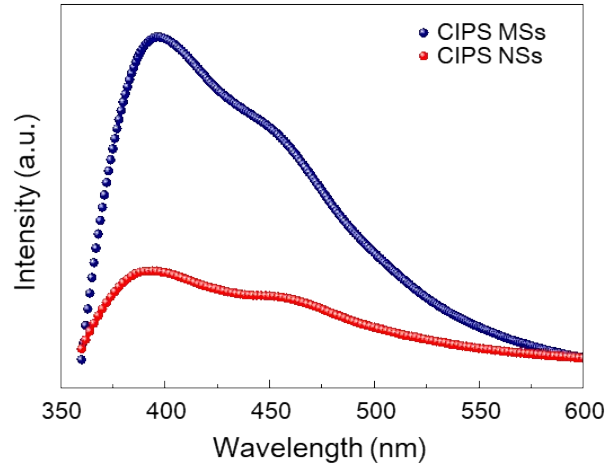

**Fig. S12** Room-temperature PL spectra of the CIPS MSs and NSs using the excitation laser with the wavelength of 320 nm.

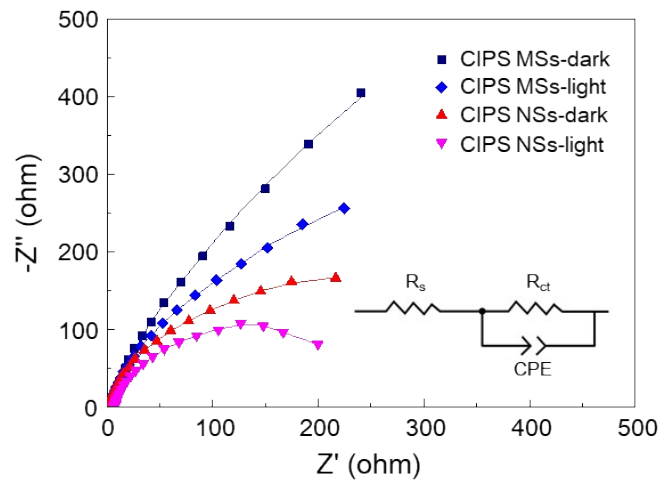

**Fig. S13** Electrochemical impedance spectra collected on the CIPS MS and NS electrodes in the 0.5 M  $\text{Na}_2\text{SO}_4$  aqueous solution without light (dark) and with Xe light illumination ( $\lambda > 300$  nm,  $200 \text{ mW cm}^{-2}$ ).

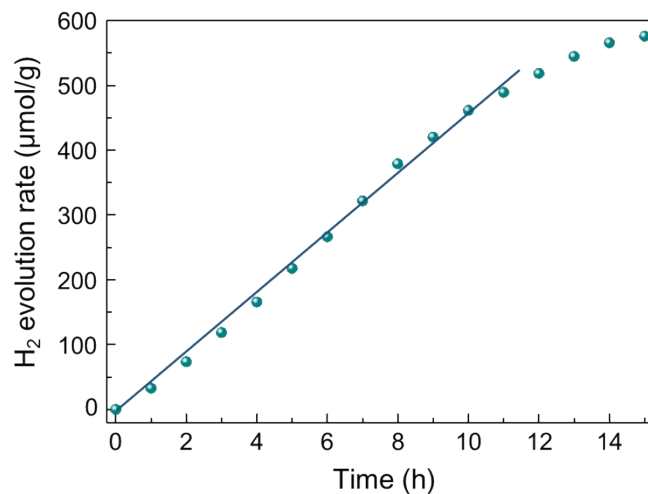

**Fig. S14** Photocatalytic H<sub>2</sub> evolution of CIPS NSs from pure water under Xe light illumination ( $\lambda > 300$  nm, 400 mW cm<sup>-2</sup>).

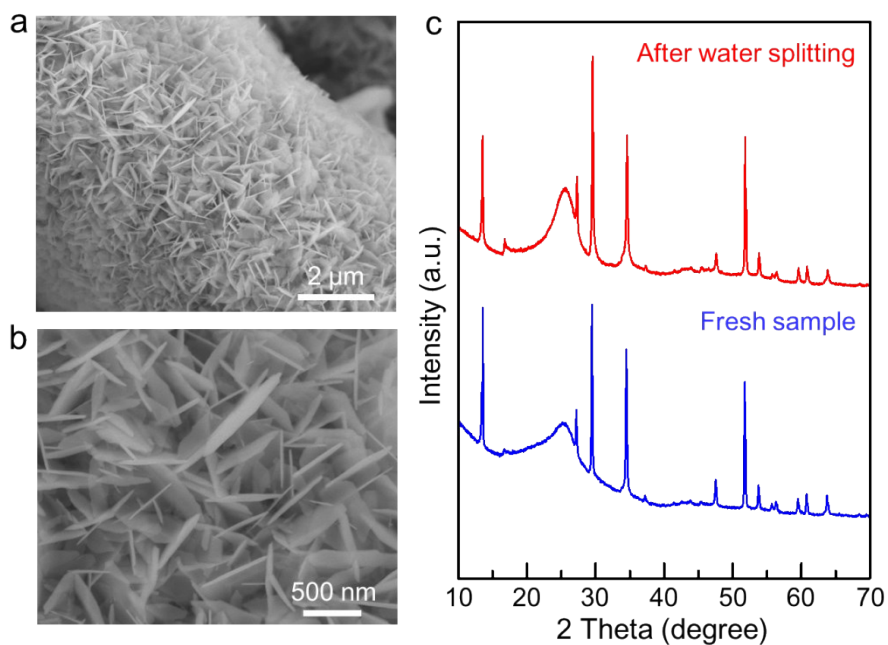

**Fig. S15** (a-b) SEM images of CIPS NSs on carbon fibers after continuously 15 h hydrogen evolution in pure water under Xe light illumination.

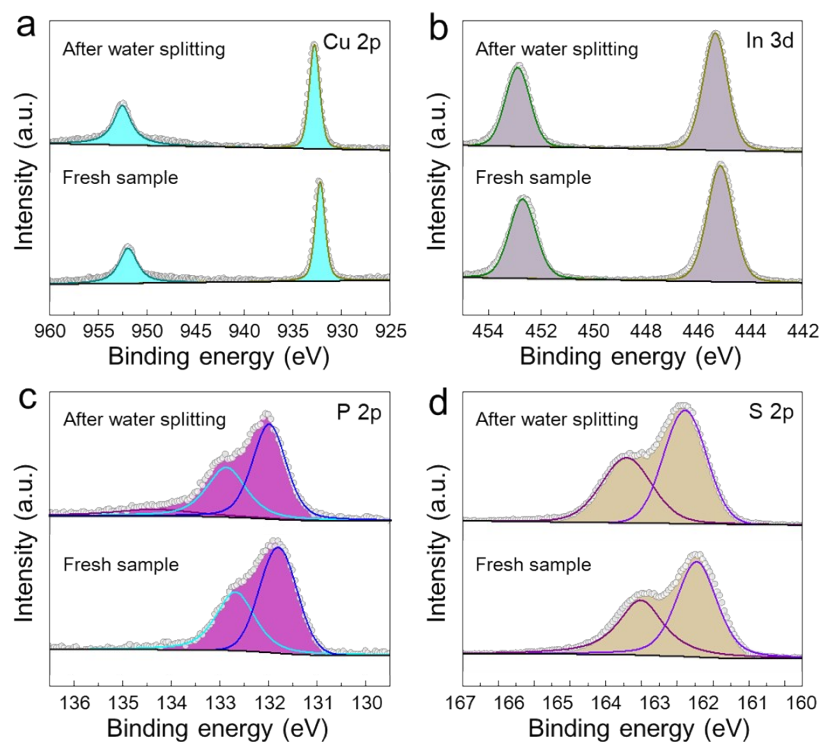

**Fig. S16** XPS spectra of CIPS NSs compared with the fresh sample in Cu 2p (a), In 3d (b), P 2p (c) and S 2p (d) regions after conducting photocatalytic water splitting in pure water under Xe light illumination.

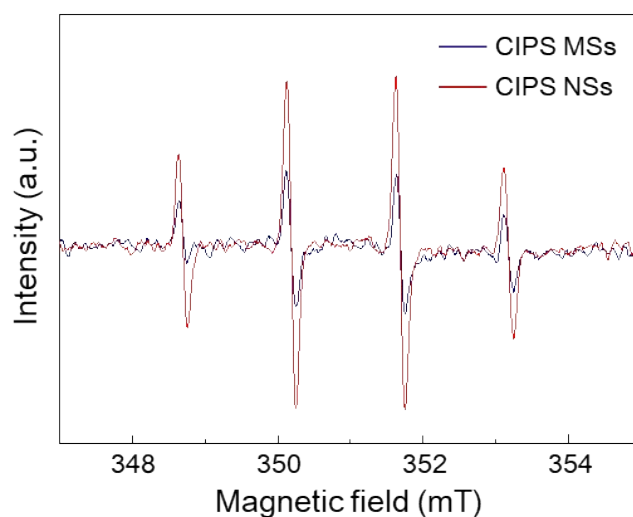

**Fig. S17** ESR responses of the DMPO-OH spin adduct in the CIPS MSs and NSs photocatalyst.

**Table S1** Lifetime parameters of time-resolved photoluminescence of CIPS MSs and NSs under 320 nm excitation.

| <b>Samples</b> | <b><math>\tau_1</math> (ns)</b> | <b><math>A_1</math> (%)</b> | <b><math>\tau_2</math> (ns)</b> | <b><math>A_2</math> (%)</b> | <b><math>\tau_A</math> (ns)</b> |
|----------------|---------------------------------|-----------------------------|---------------------------------|-----------------------------|---------------------------------|
| CIPS MSs       | 0.236                           | 93.85                       | 4.056                           | 6.15                        | 2.26                            |
| CIPS NSs       | 0.320                           | 85.81                       | 4.508                           | 14.19                       | 3.25                            |

**Table S2** Comparison of the photocatalytic H<sub>2</sub> evolution performance of various MPX<sub>3</sub>.

| Photocatalyst                     | Morphology        | Light source       | Reaction conditions                                                                 | H <sub>2</sub> evolution rate<br>( $\mu\text{mol g}^{-1} \text{h}^{-1}$ ) | Ref.                 |
|-----------------------------------|-------------------|--------------------|-------------------------------------------------------------------------------------|---------------------------------------------------------------------------|----------------------|
| CuInP <sub>2</sub> S <sub>6</sub> | nanosheets        | 300 W Xe lamp      | 0.1 M Na <sub>2</sub> S&Na <sub>2</sub> SO <sub>3</sub><br>aqueous solution         | 804                                                                       | <b>This<br/>work</b> |
|                                   |                   |                    | pure water                                                                          | 46                                                                        |                      |
|                                   | microsheets       | 300 W Xe lamp      | 0.1 M Na <sub>2</sub> S&Na <sub>2</sub> SO <sub>3</sub><br>aqueous solution         | 100                                                                       |                      |
| NiPS <sub>3</sub>                 | nanosheets        | 300 W Xe lamp      | 0.35 M Na <sub>2</sub> S&0.25 M<br>Na <sub>2</sub> SO <sub>3</sub> aqueous solution | 74.67                                                                     | 1                    |
|                                   |                   |                    | pure water                                                                          | 26.42                                                                     |                      |
|                                   |                   | AM 1.5 solar light | pure water                                                                          | 6.46                                                                      |                      |
| MnPS <sub>3</sub>                 | nanosheets        | AM 1.5 solar light | 0.35 M Na <sub>2</sub> S&0.25 M<br>Na <sub>2</sub> SO <sub>3</sub> aqueous solution | 21.2                                                                      | 2                    |
|                                   |                   |                    | pure water                                                                          | 3.1                                                                       |                      |
| MnPSe <sub>3</sub>                | nanosheets        | AM 1.5 solar light | 0.35 M Na <sub>2</sub> S&0.25 M<br>Na <sub>2</sub> SO <sub>3</sub> aqueous solution | 43.5                                                                      |                      |
|                                   |                   |                    | pure water                                                                          | 6.5                                                                       |                      |
| FePS <sub>3</sub>                 | bulk              | 300 W Xe lamp      | 10 vol % TEOA<br>aqueous solution                                                   | 94                                                                        | 3                    |
|                                   |                   |                    | pure water                                                                          | 36.1                                                                      |                      |
|                                   | quantum<br>sheets | 300 W Xe lamp      | 10 vol % TEOA<br>aqueous solution                                                   | 290                                                                       |                      |
|                                   |                   |                    | pure water                                                                          | 89.7                                                                      |                      |

**Table S3.** Comparison of the photocatalytic H<sub>2</sub> evolution performance with other 2D layered materials.

| Photocatalyst                                               | Morphology                                         | Light source                                        | Reaction conditions                                                                              | H <sub>2</sub> evolution rate ( $\mu\text{mol g}^{-1} \text{h}^{-1}$ ) | Ref.             |
|-------------------------------------------------------------|----------------------------------------------------|-----------------------------------------------------|--------------------------------------------------------------------------------------------------|------------------------------------------------------------------------|------------------|
| CuInP <sub>2</sub> S <sub>6</sub>                           | nanosheets                                         | 300 W Xe lamp                                       | 0.1 M Na <sub>2</sub> S&Na <sub>2</sub> SO <sub>3</sub> aqueous solution                         | 804                                                                    | <b>This work</b> |
|                                                             | microsheets                                        | 300 W Xe lamp                                       | 0.1 M Na <sub>2</sub> S&Na <sub>2</sub> SO <sub>3</sub> aqueous solution                         | 100                                                                    |                  |
| Graphitic carbon nitride (g-C <sub>3</sub> N <sub>4</sub> ) | carbon nanodot-carbon nitride                      | 300 W Xe lamp with 420 nm cut-off filter            | Pure Water                                                                                       | 105                                                                    | 4                |
|                                                             | half-metallic carbon nitride nanosheets            | AM 1.5 solar light                                  | 10 vol % TEOA aqueous solution                                                                   | 1009                                                                   | 5                |
|                                                             | porous P-doped graphitic carbon nitride nanosheets | 300 W Xe lamp with 400 nm cut-off filter            | 20 vol % TEOA aqueous solution, 1 wt% Pt cocatalysts                                             | 1596                                                                   | 6                |
| Black phosphorus (BP)                                       | few layered BP nanosheets                          | 300 W Xe lamp with 420 nm cut-off filter            | 15 vol % TEOA acetonitrile solution                                                              | 64                                                                     | 7                |
|                                                             | BP nanosheets                                      | 300 W Xe lamp with 420 nm cut-off filter            | 0.75 M Na <sub>2</sub> S&1.05 M Na <sub>2</sub> SO <sub>3</sub> aqueous solution                 | 512                                                                    | 8                |
|                                                             | Co-P/BP nanosheets                                 | 300 W Xe lamp with 420 nm cut-off filter            | pure water                                                                                       | 375                                                                    | 9                |
|                                                             | nanohybrid of 2D BP/g-CN nanosheets                | 300 W mercury vapor lamp with 420 nm cut-off filter | 20 vol % methanol aqueous solution                                                               | 427                                                                    | 10               |
| Transition metal dichalcogenides (TMDs)                     | SnS <sub>2</sub> nanoplates                        | 400 W Xe lamp with 420 nm cut-off filter            | 0.1 M Na <sub>2</sub> S&Na <sub>2</sub> SO <sub>3</sub> aqueous solution<br>1 wt% Pt cocatalysts | 1306                                                                   | 11               |
|                                                             | SnS <sub>2</sub> nanoplates                        | 300 W Xe lamp with 420 nm cut-off filter            | 50 mM ascorbic acid aqueous solution                                                             | 356                                                                    | 12               |
| Metal oxyhalides (MOX)                                      | Fe modified BiOCl nanosheets                       | 300 W Xe lamp with 420 nm cut-off filter            | 0.1 M Na <sub>2</sub> SO <sub>4</sub> aqueous solution                                           | 141.6                                                                  | 13               |
|                                                             | BiOI hierarchical microspheres                     | 350 W Xe lamp with 400 nm cut-off filter            | deionized water with pH 7                                                                        | 1316.9                                                                 | 14               |

## References

1. F. Wang, T. A. Shifa, P. He, Z. Cheng, J. Chu, Y. Liu, Z. Wang, F. Wang, Y. Wen, L. Liang and J. He, *Nano Energy*, 2017, **40**, 673-680.
2. T. A. Shifa, F. Wang, Z. Cheng, P. He, Y. Liu, C. Jiang, Z. Wang and J. He, *Adv. Funct. Mater.*, 2018, **28**, 1800548.
3. Z. Cheng, T. A. Shifa, F. Wang, Y. Gao, P. He, K. Zhang, C. Jiang, Q. Liu and J. He, *Adv. Mater.*, 2018, **30**, 1707433.
4. J. Liu, Y. Liu, N. Liu, Y. Han, X. Zhang, H. Huang, Y. Lifshitz, S. T. Lee, J. Zhong and Z. Kang, *Science*, 2015, **347**, 970-974.
5. G. Zhou, Y. Shan, Y. Hu, X. Xu, L. Long, J. Zhang, J. Dai, J. Guo, J. Shen, S. Li, L. Liu and X. Wu, *Nat. Commun.*, 2018, **9**, 3366.
6. J. Ran, T. Y. Ma, G. Gao, X. W. Du and S. Z. Qiao, *Energy Environ. Sci.*, 2015, **8**, 3708-3717.
7. S. K. Muduli, E. Varrla, Y. Xu, S. A. Kulkarni, A. Katre, S. Chakraborty, S. Chen, T. C. Sum, R. Xu and N. Mathews, *J. Mater. Chem. A*, 2017, **5**, 24874-24879.
8. X. Zhu, T. Zhang, Z. Sun, H. Chen, J. Guan, X. Chen, H. Ji, P. Du and S. Yang, *Adv. Mater.*, 2017, **29**, 1605776.
9. B. Tian, B. Tian, B. Smith, M. C. Scott, R. Hua, Q. Lei and Y. Tian, *Nat. Commun.*, 2018, **9**, 1397.
10. M. Zhu, S. Kim, L. Mao, M. Fujitsuka, J. Zhang, X. Wang and T. Majima, *J. Am. Chem. Soc.*, 2017, **139**, 13234-13242.
11. S. R. Damkale, S. S. Arbuj, G. G. Umarji, R. P. Panmand, S. K. Khore, R. S.

- Sonawane, S. B. Rane and B. B. Kale, *Sustain. Energy Fuels*, 2019, **3**, 3406-3414.
12. W. Fu, J. Wang, S. Zhou, R. Li and T. Peng, *ACS Appl. Nano Mater.*, 2018, **1**, 2923-2933.
13. Y. Mi, L. Wen, Z. Wang, D. Cao, R. Xu, Y. Fang, Y. Zhou and Y. Lei, *Nano Energy*, 2016, **30**, 109-117.
14. G. J. Lee, Y. C. Zheng and J. J. Wu, *Catal. Today*, 2018, **307**, 197-204.
